# Supplementary material
Source: Springer Nature journal article supplement (https://www.springermedizin.de/resource/supplementary/13054_2009_7627_MOESM4_ESM.pdf/9730186)

# Global end-diastolic blood volume versus age and gender

(a)

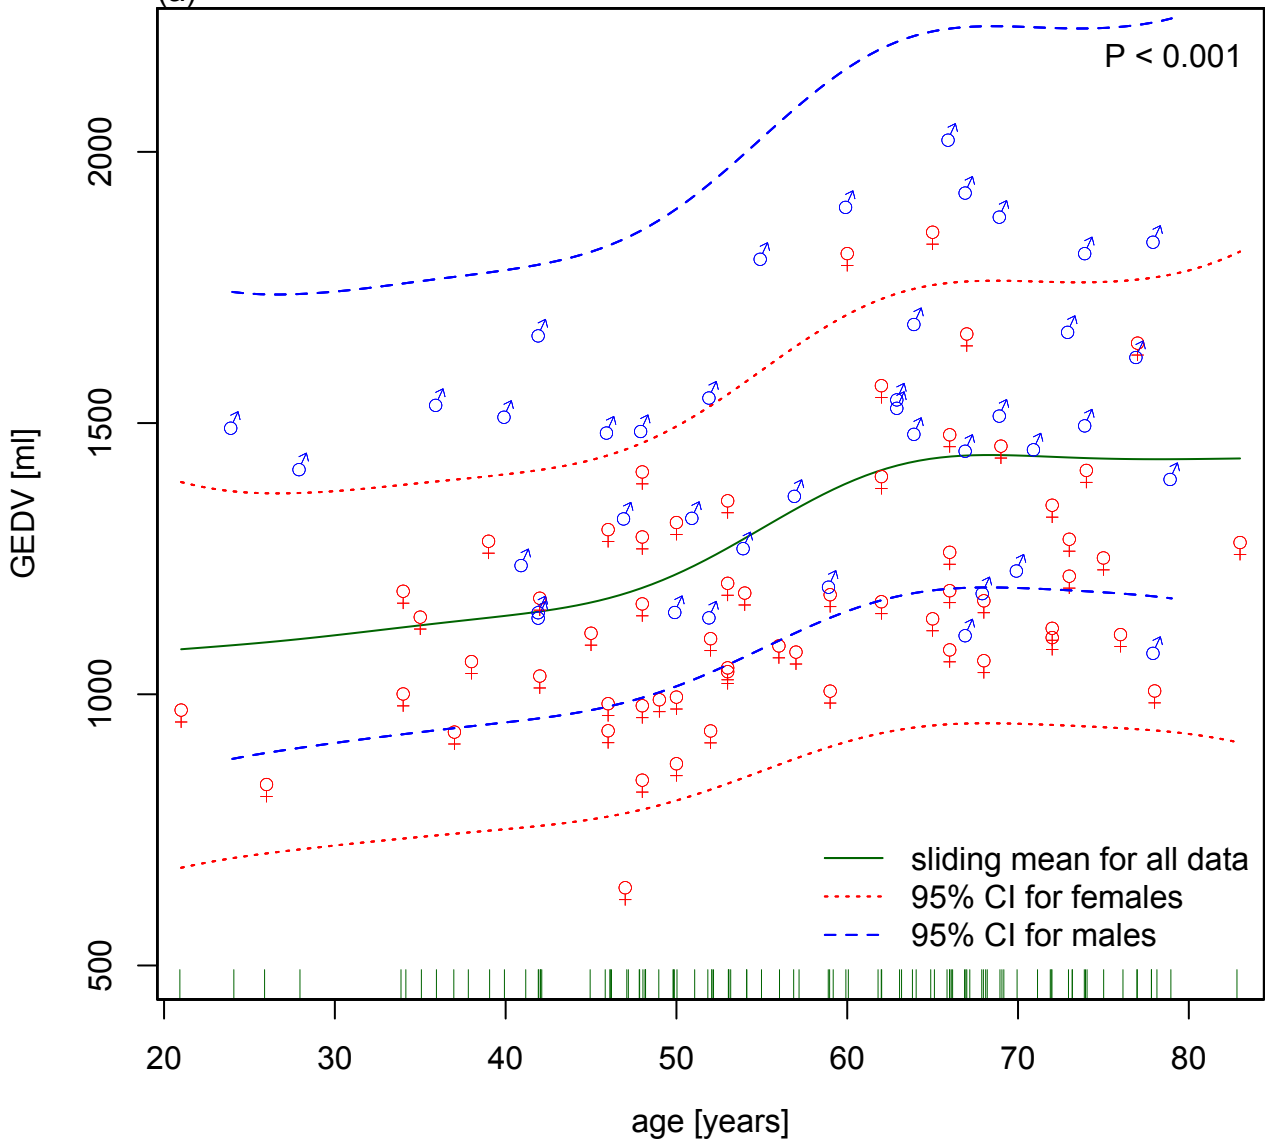

# Global end-diastolic blood volume index versus age and gender

(b)

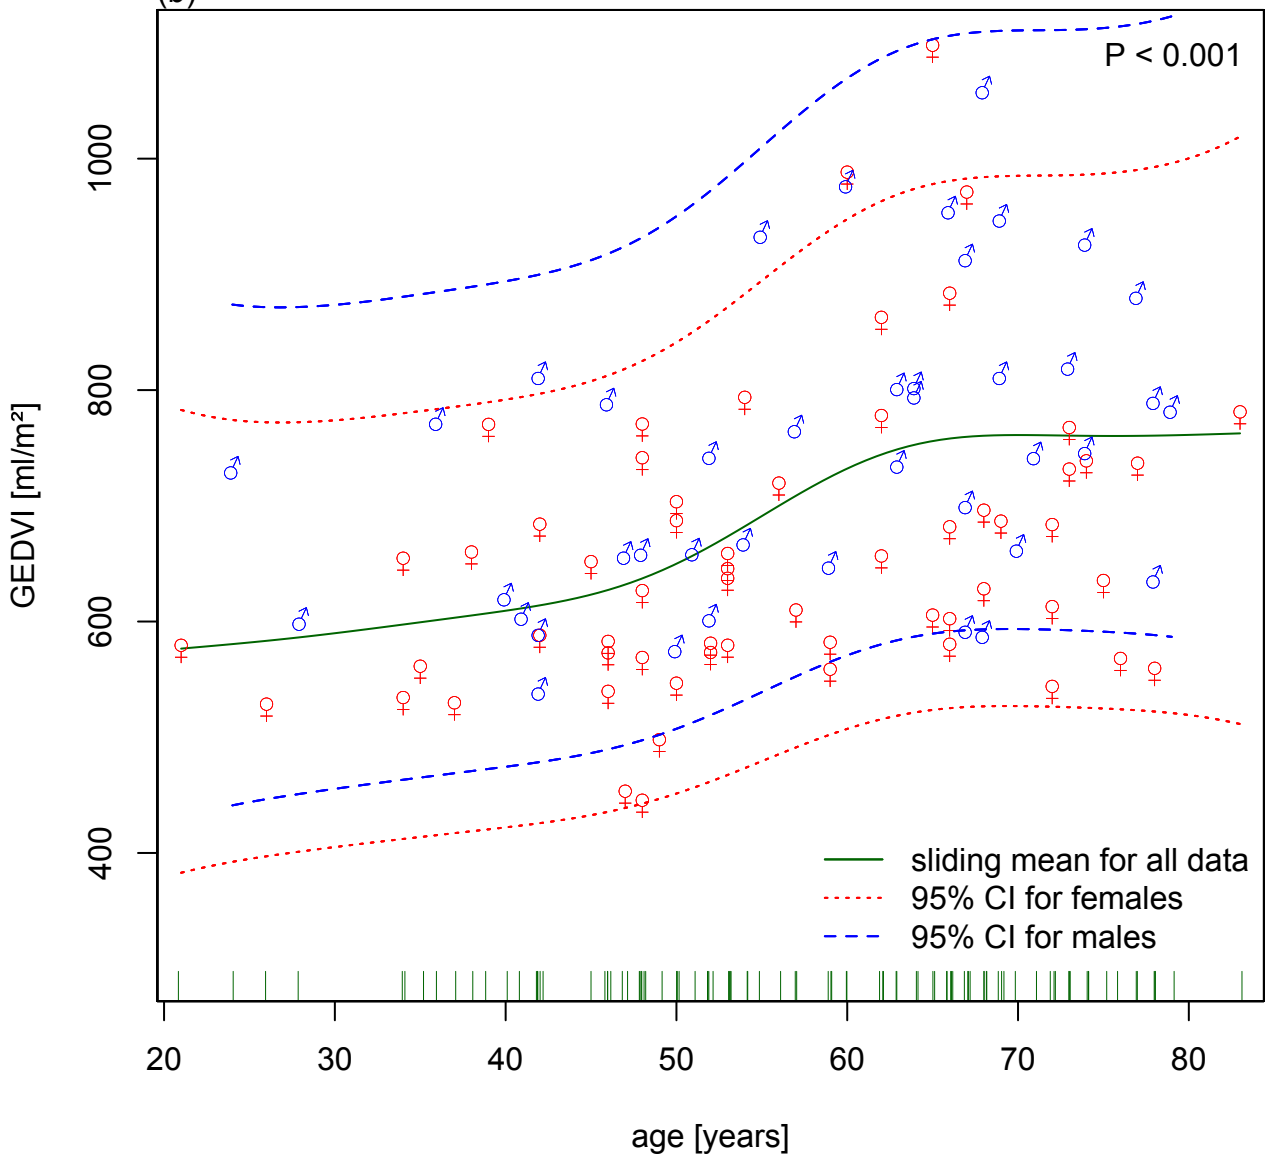

Supplement: MOESM4 [file 9730186]
